# Supplementary material
Source: bioRxiv or medRxiv preprint supplement (https://www.medrxiv.org/highwire/filestream/69490/field_highwire_adjunct_files/2/19008664-3.pdf)
Supplement: Supplementary file [file 19008664-3.pdf]

# Search Results

## Table of Contents

---

|                                                                                                                                                     |        |
|-----------------------------------------------------------------------------------------------------------------------------------------------------|--------|
| Search History .....                                                                                                                                | page 2 |
| 1. Thoracic and abdominal extravasation: a complication of hyperalimantation in infants. ....                                                       | page 4 |
| 2. [Traumatic cerebral aneurysm showing remarkable extravasation into the lateral ventricle--report of a case in an infant (author's transl)]. .... | page 4 |
| 3. Urinary ascites in children owing to extravasation of urine from the bladder. ....                                                               | page 4 |
| 4. Bone scintigraphy for neonatal osteomyelitis: simulation by extravasation of intravenous calcium. ....                                           | page 4 |
| 5. Perirenal urinary extravasation associated with urethral valves in infants. ....                                                                 | page 4 |
| 6. Nafcillin extravasation injury. Use of hyaluronidase as an antidote. ....                                                                        | page 4 |
| 7. Cutaneous calcinosis in a neonate following extravasation of calcium gluconate. ....                                                             | page 4 |
| 8. Urinary extravasation in the newborn male with posterior urethral valves. ....                                                                   | page 4 |
| 9. Intrathoracic extravasation of sclerosing agents associated with central venous catheters. ....                                                  | page 5 |
| 10. Nonoperative management of full-thickness intravenous extravasation injuries in premature neonates using enzymatic debridement. ....            | page 5 |

## Search History

---

1. AMED, EMBASE, Medline, CINAHL; p?ediatic\*.ti,ab; 2702402 results.
2. AMED, EMBASE, Medline, CINAHL; neonat\*.ti,ab; 508216 results.
3. AMED, EMBASE, Medline, CINAHL; infant\*.ti,ab; 761110 results.
4. AMED, EMBASE, Medline, CINAHL; child.ti,ab; 737276 results.
5. AMED, EMBASE, Medline, CINAHL; 1 OR 2 OR 3 OR 4; 4209881 results.
6. AMED, EMBASE, Medline, CINAHL; extra?vasat\*.ti,ab; 19189 results.
7. AMED, EMBASE, Medline, CINAHL; extravasation.ti,ab; 30514 results.
8. AMED, EMBASE, Medline, CINAHL; 6 OR 7; 32931 results.
9. AMED, EMBASE, Medline, CINAHL; 5 AND 8; 1849 results.
10. AMED, EMBASE, Medline, CINAHL; outcome\*.ti,ab; 2946939 results.
11. AMED, EMBASE, Medline, CINAHL; PROM\*.ti,ab; 2921492 results.
12. AMED, EMBASE, Medline, CINAHL; patient?related\*.ti,ab; 131 results.
13. AMED, EMBASE, Medline, CINAHL; patient?report\*.ti,ab; 689 results.
14. AMED, EMBASE, Medline, CINAHL; 10 OR 11 OR 12 OR 13; 5654365 results.
15. AMED, EMBASE, Medline, CINAHL; conservative\*.ti,ab; 231035 results.
16. AMED, EMBASE, Medline, CINAHL; non?operative\*.ti,ab; 11082 results.
17. AMED, EMBASE, Medline, CINAHL; non?surg\*.ti,ab; 14737 results.
18. AMED, EMBASE, Medline, CINAHL; cold\*.ti,ab; 225847 results.
19. AMED, EMBASE, Medline, CINAHL; cool\*.ti,ab; 101309 results.
20. AMED, EMBASE, Medline, CINAHL; hot\*.ti,ab; 160999 results.
21. AMED, EMBASE, Medline, CINAHL; warm\*.ti,ab; 110969 results.
22. AMED, EMBASE, Medline, CINAHL; elevat\*.ti,ab; 1359688 results.
23. AMED, EMBASE, Medline, CINAHL; dress\*.ti,ab; 53707 results.
24. AMED, EMBASE, Medline, CINAHL; 15 OR 16 OR 17 OR 18 OR 19 OR 20 OR 21 OR 22 OR 23; 2170626 results.
25. AMED, EMBASE, Medline, CINAHL; medic\*.ti,ab; 3892625 results.
26. AMED, EMBASE, Medline, CINAHL; steroid\*.ti,ab; 449723 results.
27. AMED, EMBASE, Medline, CINAHL; cortico?steroid\*.ti,ab; 114994 results.
28. AMED, EMBASE, Medline, CINAHL; corticosteroid\*.ti,ab; 206312 results.
29. AMED, EMBASE, Medline, CINAHL; sub?cut\*.ti,ab; 245741 results.
30. AMED, EMBASE, Medline, CINAHL; subcut\*.ti,ab; 189955 results.
31. AMED, EMBASE, Medline, CINAHL; inject\*.ti,ab; 1404121 results.
32. AMED, EMBASE, Medline, CINAHL; topical\*.ti,ab; 199318 results.
33. AMED, EMBASE, Medline, CINAHL; cream\*.ti,ab; 38332 results.
34. AMED, EMBASE, Medline, CINAHL; ointment\*.ti,ab; 24526 results.
35. AMED, EMBASE, Medline, CINAHL; emollient\*.ti,ab; 3696 results.
36. AMED, EMBASE, Medline, CINAHL; antidote\*.ti,ab; 11910 results.
37. AMED, EMBASE, Medline, CINAHL; Sodium?thiosulfate\*.ti,ab; 6 results.
38. AMED, EMBASE, Medline, CINAHL; mechlorethamine\*.ti,ab; 1486 results.
39. AMED, EMBASE, Medline, CINAHL; Dexrazoxane\*.ti,ab; 1175 results.
40. AMED, EMBASE, Medline, CINAHL; N?acetylcysteine\*.ti,ab; 1604942 results.
41. AMED, EMBASE, Medline, CINAHL; vitamin?C\*.ti,ab; 422 results.
42. AMED, EMBASE, Medline, CINAHL; ascorbic\*.ti,ab; 58559 results.
43. AMED, EMBASE, Medline, CINAHL; basic AND fibroblast AND growth AND factor.ti,ab; 29979 results.
44. AMED, EMBASE, Medline, CINAHL; granulocyte AND macrophage AND colony AND stimulating AND factor.ti,ab; 37389 results.
45. AMED, EMBASE, Medline, CINAHL; hyaluroni\*.ti,ab; 42841 results.
46. AMED, EMBASE, Medline, CINAHL; salin\*.ti,ab; 375104 results.
47. AMED, EMBASE, Medline, CINAHL; 25 OR 26 OR 27 OR 28 OR 29 OR 30 OR 31 OR 32 OR 33 OR 34 OR 35 OR 36 OR 37 OR 38 OR 39 OR 40 OR 41 OR 42 OR 43 OR 44 OR 45 OR 46; 7833762 results.
48. AMED, EMBASE, Medline, CINAHL; squeeze\*.ti,ab; 9290 results.
49. AMED, EMBASE, Medline, CINAHL; surg\*.ti,ab; 3592311 results.
50. AMED, EMBASE, Medline, CINAHL; intervention\*.ti,ab; 1719913 results.
51. AMED, EMBASE, Medline, CINAHL; irrigation\*.ti,ab; 45442 results.
52. AMED, EMBASE, Medline, CINAHL; excis\*.ti,ab; 326226 results.
53. AMED, EMBASE, Medline, CINAHL; infiltrat\*.ti,ab; 404118 results.
54. AMED, EMBASE, Medline, CINAHL; therapeut\*.ti,ab; 1901755 results.
55. AMED, EMBASE, Medline, CINAHL; manage\*.ti,ab; 2431717 results.
56. AMED, EMBASE, Medline, CINAHL; treatment\*.ti,ab; 8388485 results.

57. AMED, EMBASE, Medline, CINAHL; wash?out\*.ti,ab; 28666 results.
58. AMED, EMBASE, Medline, CINAHL; operat\*.ti,ab; 2000359 results.
59. AMED, EMBASE, Medline, CINAHL; bedside\*.ti,ab; 57042 results.
60. AMED, EMBASE, Medline, CINAHL; liposuct\*.ti,ab; 5719 results.
61. AMED, EMBASE, Medline, CINAHL; fasciotom\*.ti,ab; 5310 results.
62. AMED, EMBASE, Medline, CINAHL; 48 OR 49 OR 50 OR 51 OR 52 OR 53 OR 54 OR 55 OR 56 OR 57 OR 58 OR 59 OR 60 OR 61; 15163731 results.
63. AMED, EMBASE, Medline, CINAHL; 9 AND 24; 222 results.
64. AMED, EMBASE, Medline, CINAHL; 9 AND 47; 982 results.
65. AMED, EMBASE, Medline, CINAHL; 9 AND 62; 1130 results.
66. AMED, EMBASE, Medline, CINAHL; 24 OR 47 OR 62; 20658308 results.
67. AMED, EMBASE, Medline, CINAHL; 9 AND 66; 1455 results.
68. AMED, EMBASE, Medline, CINAHL; 67 NOT animal; 1176 results.
69. AMED, EMBASE, Medline, CINAHL; 68 NOT laboratory; 1117 results.
70. AMED, EMBASE, Medline, CINAHL; 69 NOT adult; 804 results.

**1. Thoracic and abdominal extravasation: a complication of hyperalimentation in infants.**

---

**Citation:** AJR. American journal of roentgenology, Mar 1977, vol. 128, no. 3, p. 419-422, 0361-803X (March 1977)

**Author(s):** Spriggs, D W; Brantley, R E

**Source:** Medline

**2. [Traumatic cerebral aneurysm showing remarkable extravasation into the lateral ventricle--report of a case in an infant (author's transl)].**

---

**Citation:** No shinkei geka. Neurological surgery, Apr 1977, vol. 5, no. 4, p. 371-378, 0301-2603 (April 1977)

**Author(s):** Nakamura, T; Matsuoka, Y; Nishimura, S

**Source:** Medline

**3. Urinary ascites in children owing to extravasation of urine from the bladder.**

---

**Citation:** The Journal of urology, Sep 1979, vol. 122, no. 3, p. 409-411, 0022-5347 (September 1979)

**Author(s):** Redman, J F; Seibert, J J; Arnold, W

**Source:** Medline

**4. Bone scintigraphy for neonatal osteomyelitis: simulation by extravasation of intravenous calcium.**

---

**Citation:** Radiology, Apr 1980, vol. 135, no. 1, p. 185-186, 0033-8419 (April 1980)

**Author(s):** Balsam, D; Goldfarb, C R; Stringer, B; Farruggia, S

**Source:** Medline

**5. Perirenal urinary extravasation associated with urethral valves in infants.**

---

**Citation:** The Journal of urology, Nov 1980, vol. 124, no. 5, p. 688-691, 0022-5347 (November 1980)

**Author(s):** Mitchell, M E; Garrett, R A

**Source:** Medline

**6. Nafcillin extravasation injury. Use of hyaluronidase as an antidote.**

---

**Citation:** American journal of diseases of children (1960), Dec 1981, vol. 135, no. 12, p. 1113-1114, 0002-922X (December 1981)

**Author(s):** Zenk, K E; Dungy, C I; Greene, G R

**Source:** Medline

**7. Cutaneous calcinosis in a neonate following extravasation of calcium gluconate.**

---

**Citation:** Journal of the American Academy of Dermatology, Mar 1982, vol. 6, no. 3, p. 392-395, 0190-9622 (March 1982)

**Author(s):** Hironaga, M; Fujigaki, T; Tanaka, S

**Source:** Medline

**8. Urinary extravasation in the newborn male with posterior urethral valves.**

---

**Citation:** Journal of pediatric surgery, Dec 1982, vol. 17, no. 6, p. 751-756, 0022-3468 (December 1982)

**Author(s):** Greenfield, S P; Hensle, T W; Berdon, W E; Geringer, A M

**Source:** Medline

**9. Intrathoracic extravasation of sclerosing agents associated with central venous catheters.**

---

**Citation:** The American journal of pediatric hematology/oncology, Jan 1988, vol. 10, no. 3, p. 249-251, 0192-8562 (1988)

**Author(s):** Watterson, J; Heisel, M; Cich, J A; Priest, J R

**Source:** Medline

**Full Text:** Available from *Ovid* in [American Journal of Pediatric Hematology/Oncology](#)

**10. Nonoperative management of full-thickness intravenous extravasation injuries in premature neonates using enzymatic debridement.**

---

**Citation:** Annals of plastic surgery, Feb 1989, vol. 22, no. 2, p. 146-149, 0148-7043 (February 1989)

**Author(s):** Falcone, P A; Barrall, D T; Jeyarajah, D R; Grossman, J A

**Source:** Medline

**Full Text:** Available from *Ovid* in [Annals of Plastic Surgery](#)

# Search Results

## Table of Contents

---

|                                                                                                                                                                                                                                                              |        |
|--------------------------------------------------------------------------------------------------------------------------------------------------------------------------------------------------------------------------------------------------------------|--------|
| Search History .....                                                                                                                                                                                                                                         | page 2 |
| 1. Hepatic and splenic blush on computed tomography in children following blunt abdominal trauma: Is intervention necessary? .....                                                                                                                           | page 3 |
| 2. Safety and effectiveness of intravenous pentamidine for prophylaxis of <i>Pneumocystis jirovecii</i> pneumonia in pediatric hematology/oncology patients .....                                                                                            | page 3 |
| 3. Efficacy, Safety, and Pharmacokinetics of a New 10 % Liquid Intravenous Immunoglobulin Containing High Titer Neutralizing Antibody to RSV and Other Respiratory Viruses in Subjects with Primary Immunodeficiency Disease .....                           | page 3 |
| 4. A multicenter, randomized, observer-blinded, active-controlled study evaluating the safety and effectiveness of ceftaroline compared with ceftriaxone plus vancomycin in pediatric patients with complicated community-acquired bacterial pneumonia ..... | page 3 |
| 5. Predictive factors for conservative treatment failure in grade IV pediatric blunt renal trauma .....                                                                                                                                                      | page 3 |
| 6. Clinical negligence claims in pediatric surgery in England: Pattern and trends .....                                                                                                                                                                      | page 3 |
| 7. Outcomes of peripherally inserted double lumen central catheter in very low birth weight infants .....                                                                                                                                                    | page 4 |
| 8. Pelvic Artery Embolization in the Management of Obstetrical Hemorrhage: Predictive Factors for Clinical Outcomes .....                                                                                                                                    | page 4 |
| 9. The role of interventional radiology for pediatric blunt renal trauma .....                                                                                                                                                                               | page 4 |
| 10. Safety and efficacy of gadoteric acid in pediatric magnetic resonance imaging: overview of clinical trials and post-marketing studies .....                                                                                                              | page 4 |

## Search History

---

1. EMBASE; exp PEDIATRICS/; 87850 results.
2. EMBASE; exp CHILD/; 2256483 results.
3. EMBASE; exp INFANT/; 930470 results.
4. EMBASE; exp ADOLESCENT/; 1367630 results.
5. EMBASE; exp NEWBORN/; 495069 results.
6. EMBASE; exp CONTRAST MEDIUM EXTRAVASATION/ OR exp DRUG EXTRAVASATION/ OR exp EXTRAVASATION/ OR exp INJECTION SITE EXTRAVASATION/; 11979 results.
7. EMBASE; exp OUTCOME MEASUREMENT/ OR exp OUTCOMES RESEARCH/ OR exp EVIDENCE BASED MEDICINE/ OR exp TREATMENT OUTCOME/; 1809683 results.
8. EMBASE; 1 OR 2 OR 3 OR 4 OR 5; 2973897 results.
9. EMBASE; 6 AND 8; 958 results.
10. EMBASE; 7 AND 9; 150 results.

**1. Hepatic and splenic blush on computed tomography in children following blunt abdominal trauma: Is intervention necessary?**

**Citation:** Journal of Trauma and Acute Care Surgery, 2016, vol./is. 81/2(266-270), 2163-0755;2163-0763 (2016)

**Author(s):** Ingram M.-C.E.; Siddharthan R.V.; Morris A.D.; Hill S.J.; Travers C.D.; McCracken C.E.; Heiss K.F.; Raval M.V.; Santore M.T.

**Source:** EMBASE

**Full Text:** Available from *Ovid* in [Journal of Trauma and Acute Care Surgery](#)

**2. Safety and effectiveness of intravenous pentamidine for prophylaxis of *Pneumocystis jirovecii* pneumonia in pediatric hematology/oncology patients**

**Citation:** Journal of Pediatric Hematology/Oncology, July 2016, vol./is. 38/6(e180-e185), 1077-4114;1536-3678 (26 Jul 2016)

**Author(s):** Solodokin L.J.; Klejmont L.M.; Scipione M.R.; Dubrovskaya Y.; Lighter-Fisher J.; Papadopoulos J.

**Source:** EMBASE

**Full Text:** Available from *Ovid* in [Journal of Pediatric Hematology/Oncology](#)

**3. Efficacy, Safety, and Pharmacokinetics of a New 10 % Liquid Intravenous Immunoglobulin Containing High Titer Neutralizing Antibody to RSV and Other Respiratory Viruses in Subjects with Primary Immunodeficiency Disease**

**Citation:** Journal of Clinical Immunology, August 2016, vol./is. 36/6(590-599), 0271-9142;1573-2592 (01 Aug 2016)

**Author(s):** Wasserman R.L.; Lumry W.; Harris J.; Levy R.; Stein M.; Forbes L.; Cunningham-Rundles C.; Melamed I.; Kobayashi A.L.; Du W.; Kobayashi R.

**Source:** EMBASE

**Full Text:** Available from *Springer Link Journals* in [Journal of Clinical Immunology](#)

**4. A multicenter, randomized, observer-blinded, active-controlled study evaluating the safety and effectiveness of ceftaroline compared with ceftriaxone plus vancomycin in pediatric patients with complicated community-acquired bacterial pneumonia**

**Citation:** Pediatric Infectious Disease Journal, July 2016, vol./is. 35/7(760-766), 0891-3668;1532-0987 (01 Jul 2016)

**Author(s):** Blumer J.L.; Ghonghadze T.; Cannavino C.; O'Neal T.; Jandourek A.; Friedland H.D.; Bradley J.S.

**Source:** EMBASE

**Full Text:** Available from *Ingenta* in [Pediatric Infectious Disease Journal](#), *The*  
Available from *Ovid* in [Pediatric Infectious Disease Journal](#)

**5. Predictive factors for conservative treatment failure in grade IV pediatric blunt renal trauma**

**Citation:** Journal of Pediatric Urology, April 2016, vol./is. 12/2(93.e1-93.e7), 1477-5131;1873-4898 (01 Apr 2016)

**Author(s):** Lee J.N.; Lim J.K.; Woo M.J.; Kwon S.Y.; Kim B.S.; Kim H.T.; Kim T.-H.; Yoo E.S.; Chung S.K.

**Source:** EMBASE

**6. Clinical negligence claims in pediatric surgery in England: Pattern and trends**

**Citation:** European Journal of Pediatric Surgery, February 2015, vol./is. 25/1(66-70), 0939-7248;1439-359X (February 2015)



**Author(s):** Thyoka M.  
**Source:** EMBASE

#### 7. Outcomes of peripherally inserted double lumen central catheter in very low birth weight infants

---

**Citation:** Journal of Neonatal-Perinatal Medicine, March 2016, vol./is. 9/1(99-105), 1934-5798;1878-4429 (24 Mar 2016)  
**Author(s):** Cheong S.M.; Totsu S.; Nakanishi H.; Uchiyama A.; Kusuda S.  
**Source:** EMBASE

#### 8. Pelvic Artery Embolization in the Management of Obstetrical Hemorrhage: Predictive Factors for Clinical Outcomes

---

**Citation:** CardioVascular and Interventional Radiology, December 2015, vol./is. 38/6(1477-1486), 0174-1551;1432-086X (01 Dec 2015)  
**Author(s):** Zhang E.; Liu L.; Owen R.  
**Source:** EMBASE  
**Full Text:** Available from *Springer Link Journals* in [CardioVascular and Interventional Radiology](#)

#### 9. The role of interventional radiology for pediatric blunt renal trauma

---

**Citation:** Italian Journal of Pediatrics, October 2015, vol./is. 41/1(no pagination), 1720-8424;1824-7288 (15 Oct 2015)  
**Author(s):** Lin W.-C.; Lin C.-H.  
**Source:** EMBASE  
**Full Text:** Available from *National Library of Medicine* in [Italian Journal of Pediatrics](#)  
 Available from *BioMed Central* in [Italian Journal of Pediatrics](#)  
 Available from *National Library of Medicine* in [Italian Journal of Pediatrics](#)  
 Available from *ProQuest* in [Italian Journal of Pediatrics](#)

#### 10. Safety and efficacy of gadoteric acid in pediatric magnetic resonance imaging: overview of clinical trials and post-marketing studies

---

**Citation:** Pediatric Radiology, November 2015, vol./is. 45/12(1831-1841), 0301-0449;1432-1998 (01 Nov 2015)  
**Author(s):** Balassy C.; Roberts D.; Miller S.F.  
**Source:** EMBASE  
**Full Text:** Available from *Springer Link Journals* in [Pediatric Radiology](#)

# Search Results

## Table of Contents

---

|                                                                                                                                                       |        |
|-------------------------------------------------------------------------------------------------------------------------------------------------------|--------|
| Search History .....                                                                                                                                  | page 2 |
| 1. Emergency treatment of accidental infusion leakage in the newborn. ....                                                                            | page 3 |
| 2. Childhood extravasation injuries: improved outcome following the introduction of hospital-wide guidelines.<br>.....                                | page 3 |
| 3. [Treatment protocol for extravasation lesions]. ....                                                                                               | page 3 |
| 4. The use of central venous catheters in paediatric oncology--a cautionary tale. ....                                                                | page 3 |
| 5. A new approach to management of intravenous infiltration in pediatric patients: pathophysiology, classification, and<br>treatment. ....            | page 3 |
| 6. Saline irrigation for the management of skin extravasation injury in neonates. ....                                                                | page 3 |
| 7. Extravasation injuries. ....                                                                                                                       | page 3 |
| 8. [Central venous catheters in newborn infants. Work Group Parenteral Nutrition of the Perinatology Section of the<br>Dutch Pediatric Society]. .... | page 4 |
| 9. Extravasation of parenteral alimentation fluid into the renal pelvis--a complication of central venous catheter in a<br>neonate. ....              | page 4 |
| 10. Percutaneous central line extravasation masquerading as an abscess. ....                                                                          | page 4 |

## Search History

---

1. Medline; exp PEDIATRICS/; 49428 results.
2. Medline; exp CHILD/; 1666146 results.
3. Medline; exp INFANT/; 1008023 results.
4. Medline; exp INFANT, NEWBORN/; 535610 results.
5. Medline; 1 OR 2 OR 3 OR 4; 2185064 results.
6. Medline; exp EXTRAVASATION OF DIAGNOSTIC AND THERAPEUTIC MATERIALS/; 3098 results.
7. Medline; exp "OUTCOME ASSESSMENT (HEALTH CARE)"/ OR exp PATIENT OUTCOME ASSESSMENT/ OR exp TREATMENT OUTCOME/; 815946 results.
8. Medline; exp EARLY MEDICAL INTERVENTION/; 1559 results.
9. Medline; exp THERAPEUTIC IRRIGATION/ OR exp THERAPEUTICS/; 5011881 results.
10. Medline; exp SPECIALTIES, SURGICAL/ OR exp SURGICAL PROCEDURES, OPERATIVE/; 2809893 results.
11. Medline; 8 OR 9 OR 10; 6354238 results.
12. Medline; 5 AND 6; 345 results.
13. Medline; 7 AND 12; 36 results.
14. Medline; 11 AND 12; 248 results.
15. Medline; 12 OR 13 OR 14; 345 results.

**1. Emergency treatment of accidental infusion leakage in the newborn.**

---

**Citation:** British journal of plastic surgery, Jan 2002, vol. 55, no. 1, p. 89., 0007-1226 (January 2002)

**Author(s):** Rose, Victoria; Turner, Matthew; Harris, Paul A; Moss, Anthony L H

**Source:** Medline

**Full Text:** Available from *Ovid* in [Plastic and Reconstructive Surgery](#)

**2. Childhood extravasation injuries: improved outcome following the introduction of hospital-wide guidelines.**

---

**Citation:** Journal of plastic, reconstructive & aesthetic surgery : JPRAS, Apr 2015, vol. 68, no. 4, p. 505-518, 1878-0539 (April 2015)

**Author(s):** Ghanem, Ali M; Mansour, Abdulrab; Exton, Rebecca; Powell, Jonathan; Mashhadi, Syed; Bulstrode, Neil; Smith, Gillian

**Source:** Medline

**3. [Treatment protocol for extravasation lesions].**

---

**Citation:** Cirugía pediátrica : organo oficial de la Sociedad Española de Cirugía Pediátrica, Jul 2006, vol. 19, no. 3, p. 136-139, 0214-1221 (July 2006)

**Author(s):** Andrés, A M; Burgos, L; López Gutiérrez, J C; Encinas, J L; Díaz, M; Rivas, S; Ros, Z

**Source:** Medline

**4. The use of central venous catheters in paediatric oncology--a cautionary tale.**

---

**Citation:** Scottish medical journal, Feb 1990, vol. 35, no. 1, p. 11-14, 0036-9330 (February 1990)

**Author(s):** Russell, L; Craig, J I; Mackinlay, G A; Eden, O B

**Source:** Medline

**5. A new approach to management of intravenous infiltration in pediatric patients: pathophysiology, classification, and treatment.**

---

**Citation:** Journal of infusion nursing : the official publication of the Infusion Nurses Society, Jul 2011, vol. 34, no. 4, p. 242-249, 1539-0667 (2011 Jul-Aug)

**Author(s):** Amjad, Ibrahim; Murphy, Travis; Nylander-Housholder, Linda; Ranft, Amanda

**Source:** Medline

**Full Text:** Available from *Ovid* in [Journal of Infusion Nursing](#)

**6. Saline irrigation for the management of skin extravasation injury in neonates.**

---

**Citation:** The Cochrane database of systematic reviews, Jan 2012, no. 2, p. CD008404., 1469-493X (2012)

**Author(s):** Gopalakrishnan, P N; Goel, N; Banerjee, Sujoy

**Source:** Medline

**Full Text:** Available from *John Wiley and Sons* in [Cochrane Library, The](#)

**7. Extravasation injuries.**

---

**Citation:** British journal of plastic surgery, Mar 1993, vol. 46, no. 2, p. 91-96, 0007-1226 (March 1993)

**Author(s):** Gault, D T

**Source:** Medline

**Full Text:** Available from *Ovid* in [Plastic and Reconstructive Surgery](#)

**8. [Central venous catheters in newborn infants. Work Group Parenteral Nutrition of the Perinatology Section of the Dutch Pediatric Society].**

**Citation:** Tijdschrift voor kindergeneeskunde, Jun 1993, vol. 61, no. 3, p. 76-82, 0376-7442 (June 1993)

**Author(s):** van Lingen, R A; Liem, K D; Krediet, T G

**Source:** Medline

**9. Extravasation of parenteral alimentation fluid into the renal pelvis--a complication of central venous catheter in a neonate.**

**Citation:** Journal of perinatology : official journal of the California Perinatal Association, Oct 2001, vol. 21, no. 7, p. 465-466, 0743-8346 (2001 Oct-Nov)

**Author(s):** Nadroo, A M; al-Sowailem, A M

**Source:** Medline

**Full Text:** Available from *Nature Publishing Group* in [Journal of Perinatology](#)  
Available from *Nature Publishing Group* in [Journal of Perinatology](#)  
Available from *ProQuest* in [Journal of Perinatology](#)

**10. Percutaneous central line extravasation masquerading as an abscess.**

**Citation:** Indian pediatrics, Apr 2014, vol. 51, no. 4, p. 309-310, 0974-7559 (April 2014)

**Author(s):** Govind, Binu; Tete, Prakash Ignace; Thomas, Niranjana

**Source:** Medline

**Full Text:** Available from *Springer Link Journals* in [Indian Pediatrics](#)
